# Supplementary material for: Integrating metallic nanoparticles of Au and Pt with MoS2–CdS hybrids for high-efficient photocatalytic hydrogen generation via plasmon-induced electron and energy transfer
Source: Royal Society of Chemistry journal article supplement (doi:10.1039/c7ra03912c), 2017-01-01
Supplement: c7ra03912c1.pdf [file c7ra03912c1.pdf]

## Electronic Supplementary Information

### Integrating Metallic Nanoparticles of Au and Pt with MoS<sub>2</sub>-CdS Hybrids for High-Efficient Photocatalytic Hydrogen Generation via Plasmon-Induced Electron and Energy Transfer

Kai Chen,<sup>‡a,b</sup> Liang Ma,<sup>‡a</sup> Jia-Hong Wang,<sup>‡a</sup> Zi-Qiang Cheng,<sup>a</sup> Da-Jie Yang,<sup>a,b</sup> Ying-Ying Li,<sup>a</sup> Si-Jing Ding,<sup>\*a</sup> Li Zhou<sup>\*a</sup> and Qu-Quan Wang<sup>\*a,b</sup>

<sup>a</sup>Key Laboratory of Artificial Micro- and Nano-structures of the Ministry of Education, School of Physics and Technology, Wuhan University, Wuhan 430072, P. R. China.

<sup>b</sup>The Institute for Advanced Studies, Wuhan University, Wuhan 430072, P. R. China.

\*Email: qqwang@whu.edu.cn (Q.-Q. Wang); zhouli@whu.edu.cn (L. Zhou);

sjding@whu.edu.cn (S.-J. Ding).

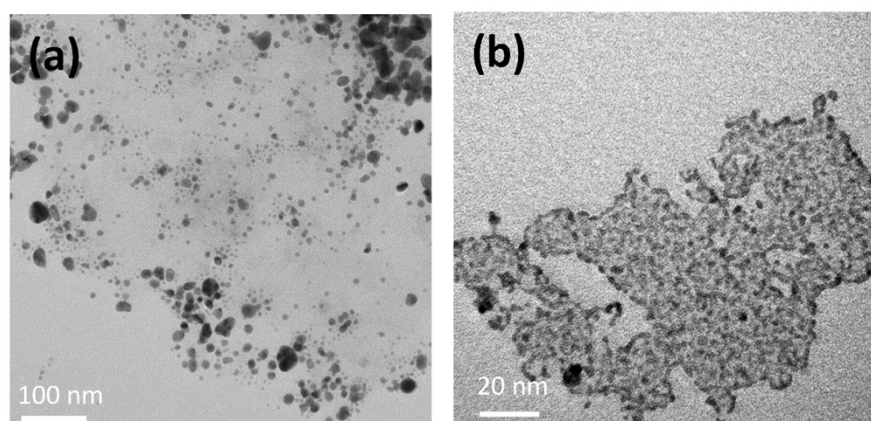

**Figure S1.** TEM images of MoS<sub>2</sub>/Au (a) and MoS<sub>2</sub>/Pt (b) hybrids.

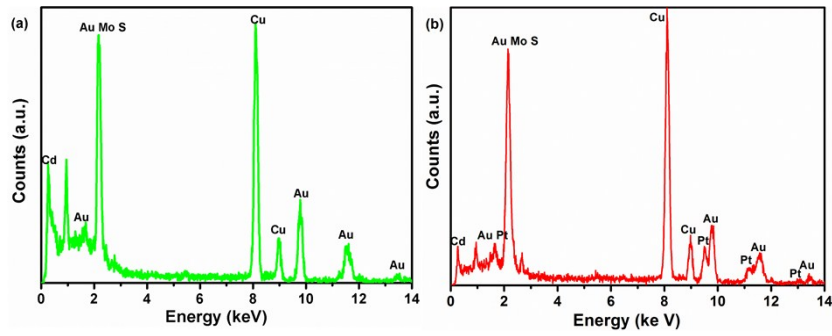

**Figure S2.** EDX spectra of (MoS<sub>2</sub>-CdS)/Au (a) and Pt/MoS<sub>2</sub>-CdS/Au (b) hybrids and the contents ratio

of the Pt, MoS<sub>2</sub> and Au is about Pt: MoS<sub>2</sub>: Au = 2: 1: 17 .

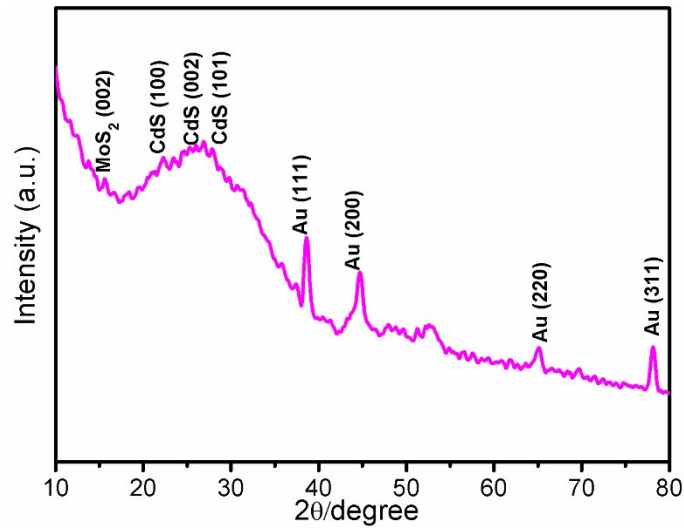

**Figure S3.** XRD pattern of (MoS<sub>2</sub>-CdS)/Au hybrids.

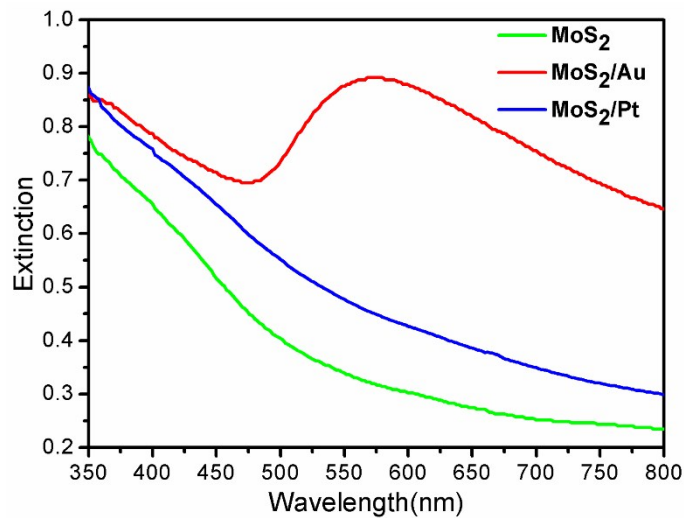

**Figure S4.** Extinction spectra of the as-synthesized samples of monolayer MoS<sub>2</sub> nanosheets, MoS<sub>2</sub>/Au

and MoS<sub>2</sub>/Pt hybrids.

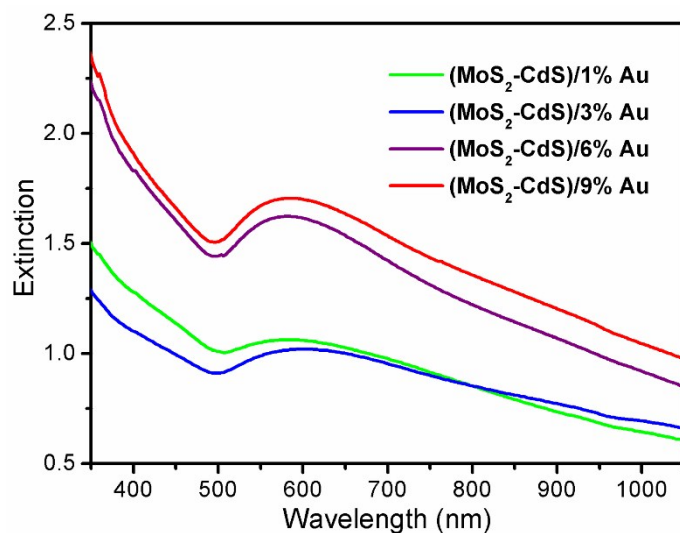

**Figure S5.** Extinction spectra of (MoS<sub>2</sub>-CdS)/Au hybrids with different quality percentages of Au.

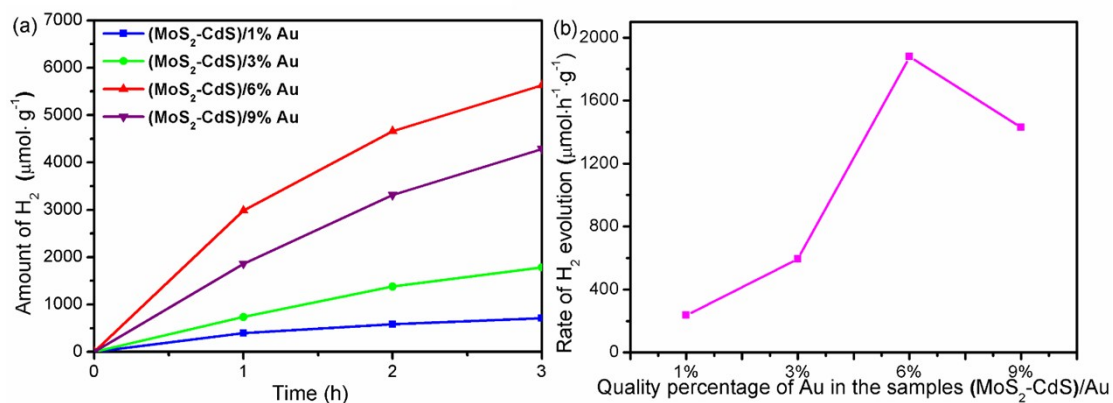

**Figure S6.** (a) Time-dependent photocatalytic H<sub>2</sub> evolution for (MoS<sub>2</sub>-CdS)/Au hybrids with different quality percentages of Au. (b) Comparison of the H<sub>2</sub> evolution rate under visible light irradiation for (MoS<sub>2</sub>-CdS)/Au hybrids with different quality percentages of Au.

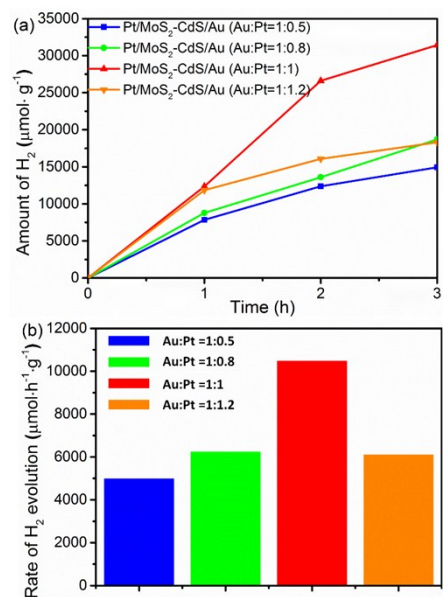

**Figure S7.** Photocatalytic activity of the as-synthesized samples for H<sub>2</sub> evolution reaction. Time-dependent photocatalytic H<sub>2</sub> evolution for different loading ratio of Pt and Au in the obtained Pt/MoS<sub>2</sub>-CdS/Au hybrid structures (a); Comparison of the average H<sub>2</sub> evolution rate in 3 hours under visible light irradiation for different loading ratio of Pt and Au in the obtained Pt/MoS<sub>2</sub>-CdS/Au hybrid structures (b).

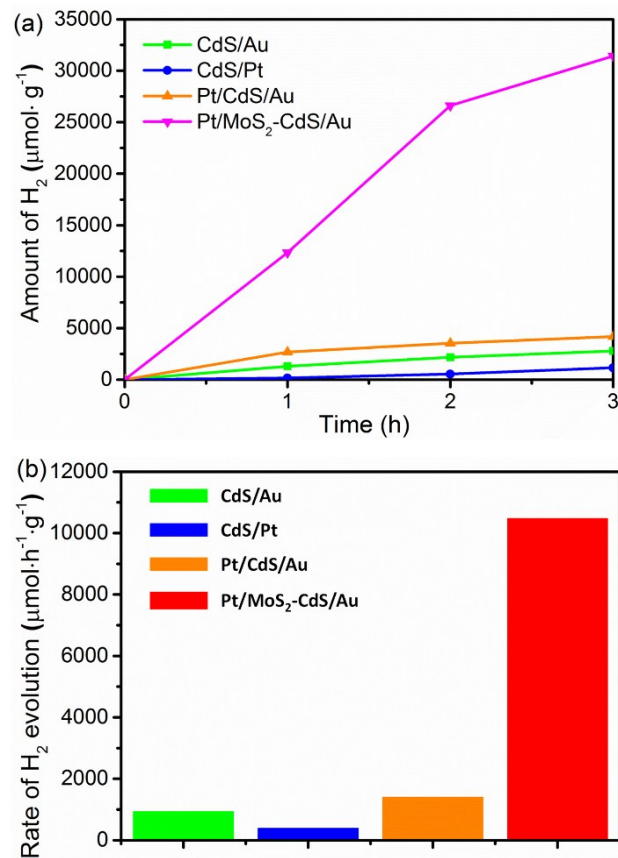

**Figure S8.** Photocatalytic activity of the as-synthesized samples for H<sub>2</sub> evolution reaction. Time-dependent photocatalytic H<sub>2</sub> evolution for CdS/Au, CdS/Pt, Pt/CdS/Au and Pt/(MoS<sub>2</sub>-CdS)/Au heterostructures (a); Comparison of the average H<sub>2</sub> evolution rate in 3 hours under visible light irradiation for CdS/Au, CdS/Pt, Pt/CdS/Au and Pt/(MoS<sub>2</sub>-CdS)/Au heterostructures (b).

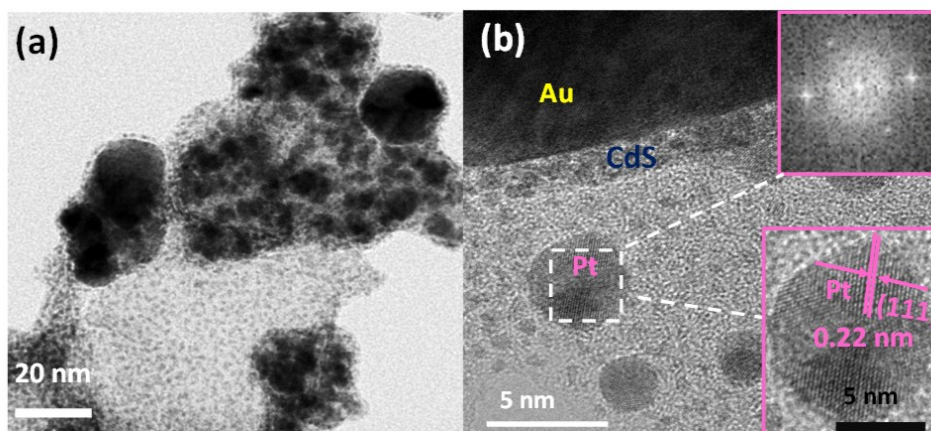

**Figure S9.** TEM (a) and HRTEM (b) images of Pt/MoS<sub>2</sub>-CdS/Au heterostructure.

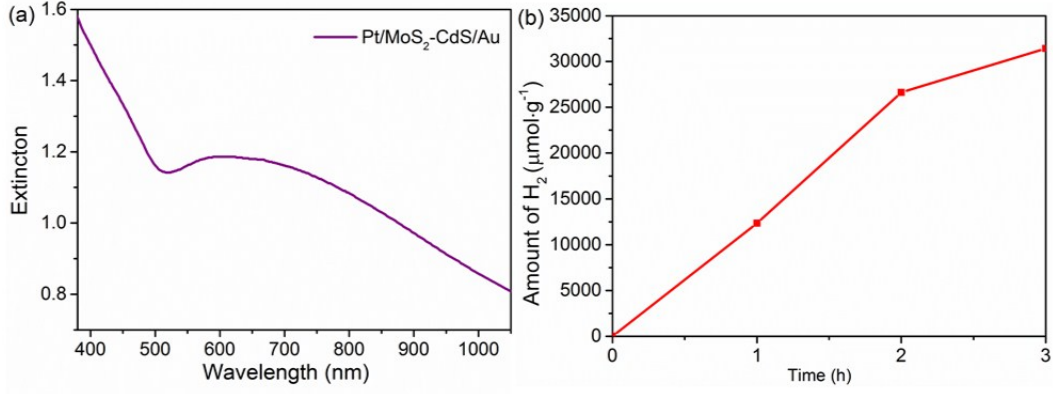

**Figure S10.** Extinction spectra (a) and Time-dependent photocatalytic H<sub>2</sub> evolution (b) for Pt/MoS<sub>2</sub>-CdS/Au heterostructure.

### The expression of enhancement factors:

$$EF_{Au} = \frac{HER\_rate[(MoS_2 - CdS) / Au]}{HER\_rate[MoS_2 - CdS]} = \frac{e_p \alpha_{CdS} k_{CdS \rightarrow MoS_2} + \alpha_{Au} (k_{Au \rightarrow CdS} k_{CdS \rightarrow MoS_2} + k_{Au \rightarrow MoS_2})}{\alpha_{CdS} k_{CdS \rightarrow MoS_2}}$$

$$= e_p + \frac{\alpha_{Au} (k_{Au \rightarrow CdS} k_{CdS \rightarrow MoS_2} + k_{Au \rightarrow MoS_2})}{\alpha_{CdS} k_{CdS \rightarrow MoS_2}} = e_p + EF_{Hot\_Sulfide}$$

$$\text{where } EF_{Hot\_Sulfide} = \frac{\alpha_{Au} (k_{Au \rightarrow CdS} k_{CdS \rightarrow MoS_2} + k_{Au \rightarrow MoS_2})}{\alpha_{CdS} k_{CdS \rightarrow MoS_2}}$$

$$EF_{Pt} = \frac{HER\_rate[(MoS_2 - CdS) / Pt]}{HER\_rate[MoS_2 - CdS]} = \frac{\alpha_{CdS} k_{CdS \rightarrow MoS_2} + \alpha_{CdS} (k_{CdS \rightarrow Pt} + k_{CdS \rightarrow MoS_2} k_{MoS_2 \rightarrow Pt})}{\alpha_{CdS} k_{CdS \rightarrow MoS_2}}$$

$$= 1 + \frac{\alpha_{CdS} (k_{CdS \rightarrow Pt} + k_{CdS \rightarrow MoS_2} k_{MoS_2 \rightarrow Pt})}{\alpha_{CdS} k_{CdS \rightarrow MoS_2}}$$

$$EF_{Au+Pt} = \frac{HER\_rate[Pt / MoS_2 - CdS / Au]}{HER\_rate[MoS_2 - CdS]}$$

$$= \frac{e_p \alpha_{CdS} k_{CdS \rightarrow MoS_2} + e_p \alpha_{CdS} (k_{CdS \rightarrow Pt} + k_{CdS \rightarrow MoS_2} k_{MoS_2 \rightarrow Pt})}{\alpha_{CdS} k_{CdS \rightarrow MoS_2}} + \frac{\alpha_{Au} (k_{Au \rightarrow CdS} k_{CdS \rightarrow MoS_2} + k_{Au \rightarrow MoS_2}) (1 + k_{MoS_2 \rightarrow Pt}) + \alpha_{Au} k_{Au \rightarrow Pt}}{\alpha_{CdS} k_{CdS \rightarrow MoS_2}}$$

$$= e_p + \frac{e_p \alpha_{CdS} (k_{CdS \rightarrow Pt} + k_{CdS \rightarrow MoS_2} k_{MoS_2 \rightarrow Pt})}{\alpha_{CdS} k_{CdS \rightarrow MoS_2}} + \frac{\alpha_{Au} (k_{Au \rightarrow CdS} k_{CdS \rightarrow MoS_2} + k_{Au \rightarrow MoS_2})}{\alpha_{CdS} k_{CdS \rightarrow MoS_2}}$$

$$+ \frac{\alpha_{Au} (k_{Au \rightarrow CdS} k_{CdS \rightarrow MoS_2} + k_{Au \rightarrow MoS_2}) k_{MoS_2 \rightarrow Pt} + \alpha_{Au} k_{Au \rightarrow Pt}}{\alpha_{CdS} k_{CdS \rightarrow MoS_2}}$$

$$= e_p EF_{Pt} + EF_{Hot\_Sulfide} + EF_{Hot\_Pt}$$

$$= EF_{Au} + e_p (EF_{Pt} - 1) + EF_{Hot\_Pt}$$

$$EF_{Hot\_Pt} = \frac{\alpha_{Au} (k_{Au \rightarrow CdS} k_{CdS \rightarrow MoS_2} + k_{Au \rightarrow MoS_2}) k_{MoS_2 \rightarrow Pt} + \alpha_{Au} k_{Au \rightarrow Pt}}{\alpha_{CdS} k_{CdS \rightarrow MoS_2}}$$

here
